# Supplementary material for: TIMAP, a Regulatory Subunit of Protein Phosphatase 1, Inhibits In Vitro Neuronal Differentiation
Source: MDPI journal article supplement (doi:10.3390/ijms242417360), 2023-12-11
Supplement: s1 [file s1]

SFig 1.

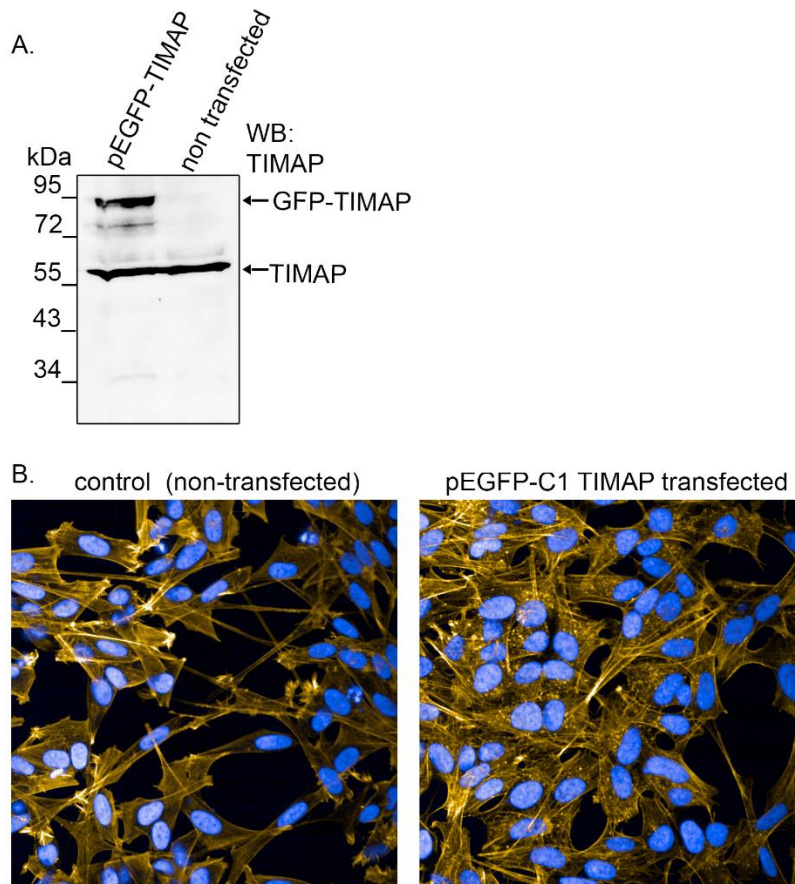

**Figure S1.** (A) Overexpression of TIMAP was tested using anti-TIMAP antibody in Western blot experiment. TIMAP antibody recognized endogenous and GFP-tagged TIMAP protein. (B) Differentiated control and pEGFP-C1 TIMAP-expressing cells were analyzed using Opera Phenix HCS. Actin filaments were stained with Texas Red Phalloidin, and nuclei were visualized by DAPI staining.
